# Supplementary material for: CTCA for detection of significant coronary artery disease in routine TAVI work-up: A systematic review and meta-analysis
Source: Neth Heart J. 2018 Sep 3;26(12):591–9. doi: 10.1007/s12471-018-1149-6 (PMC6288031; doi:10.1007/s12471-018-1149-6)
Supplement: Supplementary file 4 — Suppl. Table 4 Methodological quality assessment of included studies by QUADAS-2 [file 12471_2018_1149_MOESM4_ESM.doc]

# Supplementary Table 4 Methodological quality assessment of included studies by QUADAS-2

|  | **Risk of Bias** | | | | **Applicability concerns** | | |
| --- | --- | --- | --- | --- | --- | --- | --- |
|  | **Patient-selection** | **Index Test** | **Reference standard** | **Flow and timing** | **Patient-selection** | **Index Test** | **Reference standard** |
| Pontone, 2011 |  |  | ? | ? |  |  |  |
| Andreini, 2014 |  |  |  |  |  |  |  |
| Hamdan, 2014 |  |  |  |  |  |  |  |
| Opolski, 2014 |  |  |  |  |  |  |  |
| Harris, 2015 | ? |  | ? |  |  |  |  |
| Matsumoto, 2016 | ? |  | ? |  |  |  |  |
| Rossi, 2017 |  |  |  |  |  |  |  |

**Symbols represents the reported risk of bias or the concerns about applicability**.  = low risk,  = high risk, ? = unclear risk. QUADAS-2 = Quality Assessment of Studies of Diagnostic Accuracy Included in Systematic Reviews 2
